# Supplementary material for: Safety and immunogenicity of a seasonal trivalent inactivated split influenza vaccine: a double blind, phase III randomized clinical trial in healthy Serbian adults
Source: PubMed Central journal article supplement — Ther Adv Vaccines Immunother. 2020 May 25;8:2515135520925336. doi: 10.1177/2515135520925336 (PMC7252356; doi:10.1177/2515135520925336), 2020-05-25
Supplement: Supplementary_tables.pdf [file Supplementary_tables.pdf]

## Supplementary Tables

**Supplementary Table 1: Trial Scheme - Schedule of events for each participant**

| Study Activities                                                                                                                                                                                          | Study Day (# days from D1) |             |                  |              |                   |                   |
|-----------------------------------------------------------------------------------------------------------------------------------------------------------------------------------------------------------|----------------------------|-------------|------------------|--------------|-------------------|-------------------|
|                                                                                                                                                                                                           | S1/D1*<br>(D1 +4)          | D1 to<br>D5 | D8<br>(+/-<br>1) | D9 to<br>D21 | D22<br>(+/-<br>1) | D91<br>(+/-<br>7) |
| Information process and written informed consent                                                                                                                                                          | X                          |             |                  |              |                   |                   |
| Collect baseline demographic data                                                                                                                                                                         | X                          |             |                  |              |                   |                   |
| Collect/review medical history                                                                                                                                                                            | X                          |             |                  |              |                   |                   |
| Perform general physical examination                                                                                                                                                                      | X                          |             |                  |              |                   |                   |
| Perform vital signs & targeted physical examination (symptom based & reactogenicity only)                                                                                                                 | X*                         |             | X                |              |                   |                   |
| Perform urine pregnancy check (women of childbearing potential)                                                                                                                                           | X*                         |             |                  |              |                   |                   |
| Check/confirm inclusion/exclusion criteria                                                                                                                                                                | X*                         |             |                  |              |                   |                   |
| Randomization                                                                                                                                                                                             | X                          |             |                  |              |                   |                   |
| Collect serum for influenza serology (pre-vaccination for Day 1)                                                                                                                                          | X                          |             |                  |              | X                 |                   |
| <b>Administer one dose of study product (vaccine or placebo)</b>                                                                                                                                          | <b>X</b>                   |             |                  |              |                   |                   |
| Observe for 30 Minutes; record and manage immediate reactions                                                                                                                                             | X                          |             |                  |              |                   |                   |
| Instruct participant on use of Memory Aid                                                                                                                                                                 | X                          |             |                  |              |                   |                   |
| Participant records solicited reactogenicity and unsolicited AEs and any SAEs in Memory Aid                                                                                                               | X                          | X           |                  |              |                   |                   |
| Clinical staff reviews interim AEs/SAEs with participant; records in CRF                                                                                                                                  |                            |             | X                |              | X                 | SAE only          |
| Report SAEs to Sponsor, IRBs and regulatory authorities                                                                                                                                                   | X                          | X           | X                | X            | X                 | X                 |
| Participant completion of study                                                                                                                                                                           |                            |             |                  |              |                   | X                 |
| *If Day 1 is conducted on a different day from S1, eligibility must be confirmed again on Day of Injection (D1); including Targeted physical examination (PE); inclusion/exclusion; urine pregnancy test. |                            |             |                  |              |                   |                   |

**Supplementary Table 2:** Details of Ethics committee/Institutional Review Board Overseeing the study.

| <b>Investigator</b>                                   | <b>Local IRB/Reference Number/Date</b>                                                                                              |
|-------------------------------------------------------|-------------------------------------------------------------------------------------------------------------------------------------|
| WHO                                                   | WHO ERC<br>Protocol ID: ERC.0002816<br>Meeting Date: 15/09/2016                                                                     |
| Dr. Goran Stevanovic                                  | Clinical Center Of Serbia Ethics Committee,<br>Ref. Number: 168/16 – B<br>Date: 22 Sep 2016                                         |
| Prof. Dr. Milos Stojiljkovic/Dr. Aleksandar Obradovic | Ethics Committee of Special Gynecology Hospital with Maternity “Jevremova<br>Ref. Number: 301/2016<br>Date: 17 Oct 2016             |
| Dr Dragan Petrovic                                    | Institute of Health Care of Ministry of Internal Affairs Ethics Committee<br>Ref. Number:2/2016<br>18 <sup>th</sup> of October 2016 |
| Dr Snezana Ristic                                     | Student Health Center Ethics Committee<br>Ref. Number: 4075<br>Dated: 23 Sep 2016                                                   |
| Prof. Dr. Branislava Milenkovic                       | Clinical Center of Serbia Ethics Committee<br>Ref. Number: 168/16 – A<br>Date: 22 Sep 2016                                          |
| Dr Danilo Mitrovic                                    | Republic of Serbia General Hospital “Vrsac”, Vrsac<br>Ethics Committee<br>Ref. Number: 01-988<br>Dated: 08 Sep 2016                 |
| Prof. Dr. Olgica Gajovic                              | Clinical Center of Kragujevac<br>Ref. Number: 01-11477<br>Date: 08 Sep 2016, BELGRADE                                               |
| Prof. Dr. Sinisa Sevic                                | Expert Collegium of Clinic for Infectious Diseases<br>Ref. Number: 15-202<br>29 AUG 2016                                            |
